# Supplementary material
Source: HighWire-hosted journal article supplement (http://www.ajnr.org/highwire/filestream/52868/field_highwire_adjunct_files/0/16-00790.pdf)
Supplement: 16-00790.pdf [file 16-00790.pdf]

**On-line Table: Interaction of statin use and other covariates in the multivariable model<sup>a</sup>**

| Outcome: Dependent Variable              | Independent Covariable                    | Statin OR Calculated at Covariable Level | OR (Statin vs No Statin) | Lower 95% CI | Upper 95% CI | P Value for Interaction with Statin Use Covariable |
|------------------------------------------|-------------------------------------------|------------------------------------------|--------------------------|--------------|--------------|----------------------------------------------------|
| Major ipsilateral ischemic stroke        | Age                                       | At age = 49                              | 2.43                     | 0.76         | 7.75         | .313                                               |
|                                          |                                           | At age = 58                              | 1.76                     | 0.80         | 3.85         |                                                    |
|                                          |                                           | At age = 67                              | 1.27                     | 0.55         | 2.91         |                                                    |
|                                          | Multiple PED use                          | At multiple PED use = yes                | 1.79                     | 0.68         | 4.69         | .534                                               |
|                                          |                                           | At multiple PED use = no                 | 1.12                     | 0.34         | 3.66         |                                                    |
|                                          | Aneurysm type                             | At aneurysm type = dissecting            | 13.97                    | 0.94         | 207.48       | .393                                               |
|                                          |                                           | At aneurysm type = fusiform              | 1.53                     | 0.44         | 5.37         |                                                    |
|                                          |                                           | At aneurysm type = other                 | 2.12                     | 0.18         | 25.67        |                                                    |
|                                          | Aneurysm size                             | At aneurysm type = saccular              | 1.14                     | 0.40         | 3.27         | .814                                               |
|                                          |                                           | At aneurysm size = 6.5                   | 1.63                     | 0.56         | 4.73         |                                                    |
|                                          |                                           | At aneurysm size = 11                    | 1.55                     | 0.67         | 3.55         |                                                    |
|                                          | Study                                     | At aneurysm size = 17.3                  | 1.44                     | 0.64         | 3.22         | .761                                               |
|                                          |                                           | At study = ASP                           | 2.38                     | 0.31         | 18.54        |                                                    |
|                                          |                                           | At study = INT                           | 1.57                     | 0.68         | 3.63         |                                                    |
|                                          | Major ipsilateral intracranial hemorrhage | Age                                      | At age = 49              | 0.10         | 0.003        | 2.98                                               |
| At age = 58                              |                                           |                                          | 0.17                     | 0.02         | 1.69         |                                                    |
| At age = 67                              |                                           |                                          | 0.31                     | 0.08         | 1.27         |                                                    |
| Multiple PED use                         |                                           | At multiple PED use = yes                | 0.29                     | 0.06         | 1.56         | .673                                               |
|                                          |                                           | At multiple PED use = no                 | 0.48                     | 0.09         | 2.63         |                                                    |
| Aneurysm type                            |                                           | At aneurysm type = dissecting            | 1.36                     | 0.04         | 43.45        | .629                                               |
|                                          |                                           | At aneurysm type = fusiform              | 0.50                     | 0.08         | 3.20         |                                                    |
|                                          |                                           | At aneurysm type = other                 | 1.28                     | 0.11         | 14.83        |                                                    |
| Aneurysm size                            |                                           | At aneurysm type = saccular              | 0.14                     | 0.01         | 2.11         | .707                                               |
|                                          |                                           | At aneurysm size = 6.5                   | 0.28                     | 0.04         | 1.99         |                                                    |
|                                          |                                           | At aneurysm size = 11                    | 0.32                     | 0.08         | 1.38         |                                                    |
| Study                                    |                                           | At aneurysm size = 17.3                  | 0.40                     | 0.12         | 1.36         | .843                                               |
|                                          |                                           | At study = ASP                           | 0.21                     | 0.01         | 3.79         |                                                    |
|                                          |                                           | At study = INT                           | 0.48                     | 0.12         | 1.88         |                                                    |
| Major morbidity                          |                                           | Age                                      | At study = PUF           | 0.69         | 0.03         | 14.98                                              |
|                                          | At age = 49                               |                                          | 1.26                     | 0.40         | 3.93         |                                                    |
|                                          | At age = 58                               |                                          | 1.01                     | 0.48         | 2.12         |                                                    |
|                                          | Multiple PED use                          | At age = 67                              | 0.80                     | 0.40         | 1.61         | .729                                               |
|                                          |                                           | At multiple PED use = yes                | 0.94                     | 0.40         | 2.21         |                                                    |
|                                          | Aneurysm type                             | At multiple PED use = no                 | 0.75                     | 0.26         | 2.11         | .409                                               |
|                                          |                                           | At aneurysm type = dissecting            | 4.53                     | 0.42         | 48.78        |                                                    |
|                                          |                                           | At aneurysm type = fusiform              | 0.95                     | 0.32         | 2.86         |                                                    |
|                                          | Aneurysm size                             | At aneurysm type = other                 | 1.76                     | 0.24         | 12.91        | .903                                               |
|                                          |                                           | At aneurysm type = saccular              | 0.59                     | 0.22         | 1.63         |                                                    |
|                                          |                                           | At aneurysm size = 6.5                   | 0.90                     | 0.34         | 2.38         |                                                    |
|                                          | Study                                     | At aneurysm size = 11                    | 0.88                     | 0.42         | 1.84         | .677                                               |
|                                          |                                           | At aneurysm size = 17.3                  | 0.85                     | 0.42         | 1.72         |                                                    |
|                                          |                                           | At study = ASP                           | 0.59                     | 0.10         | 3.56         |                                                    |
|                                          | Neurologic mortality                      | Age                                      | At study = INT           | 1.04         | 0.50         | 2.18                                               |
| At study = PUF                           |                                           |                                          | 0.34                     | 0.02         | 6.73         |                                                    |
| At age = 49                              |                                           |                                          | 2.90                     | 0.64         | 13.26        |                                                    |
| Multiple PED use                         |                                           | At age = 58                              | 1.39                     | 0.53         | 3.65         | .313                                               |
|                                          |                                           | At age = 67                              | 0.67                     | 0.30         | 1.50         |                                                    |
| Aneurysm type                            |                                           | At multiple PED use = yes                | 0.95                     | 0.34         | 2.61         | .239                                               |
|                                          |                                           | At multiple PED use = no                 | 0.40                     | 0.10         | 1.57         |                                                    |
|                                          |                                           | At aneurysm type = dissecting            | 4.56                     | 0.39         | 53.00        |                                                    |
| Aneurysm size                            |                                           | At aneurysm type = fusiform              | 1.23                     | 0.33         | 4.65         | .762                                               |
|                                          |                                           | At aneurysm type = other                 | 0.70                     | 0.10         | 4.73         |                                                    |
|                                          |                                           | At aneurysm type = saccular              | 0.25                     | 0.05         | 1.32         |                                                    |
| Study                                    |                                           | At aneurysm size = 6.5                   | 0.58                     | 0.16         | 2.09         | .834                                               |
|                                          |                                           | At aneurysm size = 11                    | 0.63                     | 0.24         | 1.63         |                                                    |
|                                          |                                           | At aneurysm size = 17.3                  | 0.70                     | 0.30         | 1.59         |                                                    |
| Major morbidity and neurologic mortality |                                           | Age                                      | At study = ASP           | 0.36         | 0.02         | 7.07                                               |
|                                          | At study = INT                            |                                          | 0.80                     | 0.34         | 1.91         |                                                    |
|                                          | At study = PUF                            |                                          | 0.46                     | 0.02         | 9.58         |                                                    |
|                                          | Multiple PED use                          | At age = 49                              | 1.44                     | 0.51         | 4.08         | .328                                               |
|                                          |                                           | At age = 58                              | 1.05                     | 0.53         | 2.07         |                                                    |
|                                          | Aneurysm type                             | At age = 67                              | 0.77                     | 0.42         | 1.42         | .325                                               |
|                                          |                                           | At multiple PED use = yes                | 1.06                     | 0.49         | 2.29         |                                                    |
|                                          |                                           | At multiple PED use = no                 | 0.58                     | 0.23         | 1.50         |                                                    |
|                                          | Aneurysm size                             | At aneurysm type = dissecting            | 4.08                     | 0.39         | 43.10        | .950                                               |
|                                          |                                           | At aneurysm type = fusiform              | 1.25                     | 0.48         | 3.29         |                                                    |
|                                          |                                           | At aneurysm type = other                 | 1.01                     | 0.15         | 6.58         |                                                    |
|                                          | Study                                     | At aneurysm type = saccular              | 0.52                     | 0.21         | 1.29         | .483                                               |
|                                          |                                           | At aneurysm size = 6.5                   | 0.84                     | 0.35         | 2.04         |                                                    |
|                                          |                                           | At aneurysm size = 11                    | 0.83                     | 0.43         | 1.63         |                                                    |
|                                          | Study                                     | At aneurysm size = 17.3                  | 0.82                     | 0.44         | 1.53         | .483                                               |
| At study = ASP                           |                                           | 0.43                                     | 0.07                     | 2.55         |              |                                                    |
| At study = INT                           |                                           | 1.03                                     | 0.54                     | 1.98         |              |                                                    |
|                                          | At study = PUF                            | 0.27                                     | 0.01                     | 5.34         |              |                                                    |

**On-line Table: Continued**

| Outcome: Dependent Variable     | Independent Covariable                                | Statin OR Calculated at Covariable Level | OR (Statin vs No Statin) | Lower 95% CI | Upper 95% CI | P Value for Interaction with Statin Use Covariable |
|---------------------------------|-------------------------------------------------------|------------------------------------------|--------------------------|--------------|--------------|----------------------------------------------------|
| All-cause mortality             | Age                                                   | At age = 49                              | 2.30                     | 0.56         | 9.41         | .101                                               |
|                                 |                                                       | At age = 58                              | 1.32                     | 0.53         | 3.25         |                                                    |
|                                 |                                                       | At age = 67                              | 0.75                     | 0.36         | 1.57         |                                                    |
|                                 | Multiple PED use                                      | At multiple PED use = yes                | 0.94                     | 0.37         | 2.41         | .451                                               |
|                                 |                                                       | At multiple PED use = no                 | 0.53                     | 0.16         | 1.75         |                                                    |
|                                 | Aneurysm type                                         | At aneurysm type = dissecting            | 3.35                     | 0.31         | 36.04        | .275                                               |
|                                 |                                                       | At aneurysm type = fusiform              | 1.50                     | 0.44         | 5.13         |                                                    |
|                                 |                                                       | At aneurysm type = other                 | 0.70                     | 0.10         | 4.85         |                                                    |
|                                 | Aneurysm size                                         | At aneurysm type = saccular              | 0.35                     | 0.09         | 1.30         | .681                                               |
|                                 |                                                       | At aneurysm size = 6.5                   | 0.62                     | 0.18         | 2.07         |                                                    |
|                                 |                                                       | At aneurysm size = 11                    | 0.67                     | 0.27         | 1.67         |                                                    |
|                                 | Study                                                 | At aneurysm size = 17.3                  | 0.77                     | 0.36         | 1.61         | .792                                               |
|                                 |                                                       | At study = ASP                           | 0.62                     | 0.10         | 3.92         |                                                    |
|                                 |                                                       | At study = INT                           | 0.90                     | 0.39         | 2.06         |                                                    |
|                                 | Without complete aneurysm occlusion at last follow-up | Age                                      | At study = PUF           | 0.34         | 0.02         | 6.87                                               |
| At age = 49                     |                                                       |                                          | 1.50                     | 0.39         | 5.70         |                                                    |
| At age = 58                     |                                                       |                                          | 1.37                     | 0.57         | 3.30         |                                                    |
| Multiple PED use                |                                                       | At age = 67                              | 1.25                     | 0.55         | 2.82         | .061                                               |
|                                 |                                                       | At multiple PED use = yes                | 0.68                     | 0.19         | 2.41         |                                                    |
| Aneurysm type                   |                                                       | At multiple PED use = no                 | 3.24                     | 1.15         | 9.13         | .947                                               |
|                                 |                                                       | At aneurysm type = dissecting            | 1.81                     | 0.09         | 38.00        |                                                    |
|                                 |                                                       | At aneurysm type = fusiform              | 1.71                     | 0.40         | 7.33         |                                                    |
| Aneurysm size                   |                                                       | At aneurysm type = saccular              | 1.61                     | 0.67         | 3.87         | .570                                               |
|                                 |                                                       | At aneurysm size = 6.5                   | 1.18                     | 0.29         | 4.75         |                                                    |
|                                 |                                                       | At aneurysm size = 11                    | 1.38                     | 0.52         | 3.66         |                                                    |
| Study                           |                                                       | At aneurysm size = 17.3                  | 1.73                     | 0.80         | 3.71         | .074                                               |
|                                 |                                                       | At study = ASP                           | 2.59                     | 1.03         | 6.52         |                                                    |
|                                 |                                                       | At study = PUF                           | 0.41                     | 0.07         | 2.48         |                                                    |
| Stenosis >50% at last follow-up |                                                       | Age                                      | At study = ASP           | 4.37         | 0.45         | 42.39                                              |
|                                 | At age = 49                                           |                                          | 3.26                     | 0.64         | 16.52        |                                                    |
|                                 | At age = 58                                           |                                          | 2.43                     | 0.34         | 17.55        |                                                    |
|                                 | Multiple PED use                                      | At age = 67                              | 4.63                     | 0.70         | 30.90        | .383                                               |
|                                 |                                                       | At multiple PED use = yes                | 0.85                     | 0.03         | 25.54        |                                                    |
|                                 | Aneurysm type                                         | At multiple PED use = no                 | 5.44                     | 0.53         | 56.03        | .447                                               |
|                                 |                                                       | At aneurysm type = fusiform              | 1.53                     | 0.17         | 13.92        |                                                    |
|                                 |                                                       | At aneurysm type = saccular              | 1.75                     | 0.03         | 104.33       |                                                    |
|                                 | Aneurysm size                                         | At aneurysm size = 6.5                   | 2.01                     | 0.09         | 44.35        | .806                                               |
|                                 |                                                       | At aneurysm size = 11                    | 2.45                     | 0.35         | 17.11        |                                                    |
|                                 |                                                       | At aneurysm size = 17.3                  | 0.72                     | 0.04         | 14.91        |                                                    |
|                                 | Study                                                 | At study = ASP                           | 4.97                     | 0.70         | 35.37        | .286                                               |
|                                 |                                                       | At study = PUF                           |                          |              |              |                                                    |

**Note:**—ASP indicates ASPIRe; INT, IntrePED; PUF, PUFs.

<sup>a</sup> Interaction models included all covariables listed with the addition of statin use by covariable interaction term indicated, except for the outcome of “without complete aneurysm occlusion at last follow-up,” which, due to nonconvergence issues, is modeled with covariables for statin use, the covariable indicated, and the interaction term only.
